# Supplementary material for: Effectiveness of integrated care interventions for patients with long-term conditions: a review of systematic reviews
Source: PubMed Central journal article supplement (PMC10241031; doi:10.1136/ihj-2021-000083), 2022-06-16
Supplement: ihj-2021-000083supp001.pdf [file ihj-2021-000083supp001.pdf]

## Included Reviews:

**Supplementary Table 1:** Characteristics of the included reviews.

| N                      | Study;                 | Review type;<br>Study types;<br>n of Studies;<br>n of Databases;<br>n of Participants     | Population(s)<br>and<br>Condition(s);<br>Comparator                                                                                | QA Score;<br>Follow-up   | Interventions' Summary; Settings                                                                                                                                                                                                                                                                                                         | Main/Common Outcome<br>measures, Primary;<br>Secondary                                                                                                                                           |
|------------------------|------------------------|-------------------------------------------------------------------------------------------|------------------------------------------------------------------------------------------------------------------------------------|--------------------------|------------------------------------------------------------------------------------------------------------------------------------------------------------------------------------------------------------------------------------------------------------------------------------------------------------------------------------------|--------------------------------------------------------------------------------------------------------------------------------------------------------------------------------------------------|
| <i>Self-Management</i> |                        |                                                                                           |                                                                                                                                    |                          |                                                                                                                                                                                                                                                                                                                                          |                                                                                                                                                                                                  |
| 1                      | Zhao et al (2017)      | SR and meta-analysis; RCTs; 20; 5; 5802                                                   | ≥18 years old with T2DM;<br><br>Usual Care                                                                                         | 4.5;<br>24 weeks-2 years | Education programs with multiple different forms of education and SM theories including empowerment, health belief model (Behavioural), and health motivation;<br><br>Primary, Community                                                                                                                                                 | QoL; HbA1c, BMI, self-efficacy, self-care activities, diabetes knowledge                                                                                                                         |
| 2                      | Galdas et al (2015)    | SR and meta-analysis; RCTs; 49; 1; N/A                                                    | Adults, 18 years or older, diagnosed with one or more LTC<br><br>Males receiving SM intervention to Females or mixed-gender groups | 3.5;<br>N/A              | Distinct SM support interventions with the following elements: Physical activity, education, peer support, and HCP monitoring and feedback all delivered by different HCPs;<br><br>Primary, Community                                                                                                                                    | HRQoL; depression, anxiety, fatigue                                                                                                                                                              |
| 3                      | Saheb et al (2017)     | SR and meta-analysis; RCTs, 1 quasi-experimental study, and 2 observational; 20; 16; 2296 | ≥18 years old with T2DM<br><br>Usual care and other interventions (Except for the two observational studies)                       | 4.5;<br>N/A              | Decision aid support presented by personalised patient information on cardiovascular risk factors ("Statin Choice"), and description of five anti-hyperglycemic drugs, their treatment burden, and impact on HbA1c in facilitating SDM regarding diabetes treatment ("Diabetes Medication Choice");<br><br>Primary, Secondary, Community | QoL; HbA1C, diabetes knowledge, decision quality, risk perception, patient satisfaction, trust of physician, medication adherence                                                                |
| 4                      | Lenferink et al (2017) | SR and meta-analysis; RCTs; 22; 7; 3854                                                   | Adults diagnosed with (COPD)<br><br>Usual Care                                                                                     | 5;<br>2 days- 12 months  | Action plans for exacerbations of COPD within a self-management intervention delivered via face to face sessions with up to 12 months with follow-ups via telephone;<br><br>Primary, Secondary, Community                                                                                                                                | HRQoL, Respiratory-related hospital admissions;<br><br>All-cause hospital admissions, All-cause mortality, Respiratory-related mortality, Dyspnoea, COPD exacerbations, Courses of oral steroids |
| 5                      | Jolly et al (2016)     | SR and meta-analysis; RCTs; 193; 8; Ranged from 10 to 743                                 | Adults diagnosed with (COPD)<br><br>Usual Care or control                                                                          | 3.5;<br>1 to 27 weeks    | SM interventions with different educational components, including exercise, breathing technique and management of dyspnea, general education and other components.                                                                                                                                                                       | HRQoL, hospital admissions                                                                                                                                                                       |

|    |                       |                                          |                                                                                                                                             |                          |                                                                                                                                                                                                                                                                                                                                                                                        |                                                                                                                                                                |
|----|-----------------------|------------------------------------------|---------------------------------------------------------------------------------------------------------------------------------------------|--------------------------|----------------------------------------------------------------------------------------------------------------------------------------------------------------------------------------------------------------------------------------------------------------------------------------------------------------------------------------------------------------------------------------|----------------------------------------------------------------------------------------------------------------------------------------------------------------|
|    |                       |                                          | receiving no intervention                                                                                                                   |                          | Primary, Secondary, Community                                                                                                                                                                                                                                                                                                                                                          |                                                                                                                                                                |
| 6  | Peng et al (2019)     | SR and meta-analysis; RCTs; 19; 8; 2540  | ≥18 years old diagnosed with (CKD)<br><br>Usual Care                                                                                        | 5;<br>3-60 months        | Three types of SM interventions based on Lifestyle modifications (e.g. exercise), Medical-behaviour modifications (e.g. medication adherence), and Multifactorial modifications (combinations of lifestyle and medical behaviour) all delivered face to face or/and via telehealth instruments by different HCPs including nurses;<br><br>Primary, Secondary, Community                | All-cause mortality, progression to ESRD, change in proteinuria excretion, Risk of dialysis;<br><br>eGFR, BP, CRP, Distance on 6 min walk, HbA1c               |
| 7  | Harrison et al (2015) | SR and meta-analysis; RCTs; 7; 7; N/A    | Adults diagnosed with (COPD) receiving SM during hospitalisation for an AE-COPD or within one month of hospital discharge<br><br>Usual Care | 4;<br>2 weeks-12 months  | Comprehensive education programs delivered by nurses with face to face or/and telephone with follow-ups. Programs included topics on COPD medication management, symptoms and other related educational topics on the disease's management;<br><br>Primary, Secondary, Community                                                                                                       | HRQoL, hospital admissions, mortality;<br><br>Knowledge, Self-efficacy, Psychologic Morbidity, Primary Care Visits, Behaviour Change, Exercise capacity        |
| 8  | Howell et al (2017)   | Narrative; RCTs; 55; 5; 8084             | ≥18 years old in the active treatment or survivorship phases of the cancer journey<br><br>Usual Care or other educational interventions     | 3.5;<br>2 weeks-12months | SM interventions (face to face with follow-up) with one or more of the core elements specified by the review which mainly included: self-efficacy and care management, coaching by a trained instructor, facilitation of uptake of health behaviours through goal setting, active development of skills to communicate with health care provider;<br><br>Primary, Secondary, Community | QoL; Fatigue, pain, depression, anxiety                                                                                                                        |
| 9  | Fryer et al (2016)    | SR and meta-analysis; RCTs; 23; 1; 1863  | Adults with stroke<br><br>Usual Care or other interventions                                                                                 | 5;<br>4 weeks- 6 months  | SM interventions with multiple components including goal setting, decision-making, self-monitoring, and problem-solving delivered face-to-face or/and via telephone with follow up;<br><br>Primary, Community                                                                                                                                                                          | QoL; Self-efficacy                                                                                                                                             |
| 10 | Zwerink et al (2014)  | SR and meta-analysis; RCTs; 14; 13; 3189 | Adults with COPD<br><br>Usual Care                                                                                                          | 5;<br>2-24 months        | SM interventions with multiple components including smoking cessation and diseases knowledge, advice about exercise, and action plans delivered face-to-face or/and via the telephone with follow-up;<br><br>Primary, Secondary, Community                                                                                                                                             | HRQoL<br><br>All-cause mortality, All-cause hospital admissions, Respiratory-related hospital admission, Dyspnoea, Exercise capacity, Courses of oral steroids |

|    |                             |                                                                |                                                                                         |                     |                                                                                                                                                                                                                                                                                                                                                                                         |                                                                                                                                             |
|----|-----------------------------|----------------------------------------------------------------|-----------------------------------------------------------------------------------------|---------------------|-----------------------------------------------------------------------------------------------------------------------------------------------------------------------------------------------------------------------------------------------------------------------------------------------------------------------------------------------------------------------------------------|---------------------------------------------------------------------------------------------------------------------------------------------|
| 11 | Panagiotti et al (2014)     | SR and meta-analysis; RCTs; 187; 9; N/A                        | ≥18 years old with LTC<br><br>Usual Care or other interventions                         | 4;<br>3-84 months   | Different SM interventions with different components to improve disease-specific education, medication adherence and other disease-related management components. Delivered face-to-face or/and via telehealth instruments such as telephones;<br><br>Primary, Secondary, Community                                                                                                     | Qol, Hospital use                                                                                                                           |
| 12 | Van Eikenhorst et al (2017) | SR and meta-analysis; RCTs; 24; 6; 3,610                       | Adults diagnosed with diabetes excluding gestational diabetes<br><br>N/A                | 4;<br>4-24 months   | Multicomponent interventions which included diabetes education, medication, lifestyle, goal setting and SM skills and other topics delivered by pharmacists via face-to-face individual or group sessions and included home visits and telephone follow-ups;<br><br>Primary, Community                                                                                                  | Qol; Adherence to Medication, Diabetes Knowledge;<br><br>HbA1C, BGL, BMI, Lipid profile (Cholesterol, HDL, LDL), BP, self-care              |
| 13 | Jonkman et al (2016)        | SR and meta-analysis; RCTs; 47; 5; 10,596                      | Adults diagnosed with COPD, T2DM, CHF<br><br>Usual Care                                 | 5;<br>2-8 months    | Diverse interventions with different components including goal settings and actions plans, SM of symptoms, medication management, exercise and other components. Mode of delivery was heterogeneous and included individual and group sessions, exercise sessions in addition to Telehealth instruments including internet and Telephone contacts;<br><br>Primary, Secondary, Community | HRQoL                                                                                                                                       |
| 14 | Steinsbekk et al (2012)     | SR and meta-analysis; RCTs; 26; 5; 2833                        | Adults diagnosed with T2DM.<br><br>Routine Treatment                                    | 4.5;<br>6-24 months | Group-based education sessions with or without groups discussion and home visits delivered by one or more member of an MDT (GPs, social workers, nutritionists, nurses) and with or without telephone follow-ups;<br><br>Primary, Secondary, Community                                                                                                                                  | HbA1C, fasting blood glucose, diabetes knowledge, Qol and self-efficacy.<br><br>BMI, BP, Lipid profile, Patient satisfaction, and mortality |
| 15 | Newham et al (2017)         | SR of reviews and meta-analysis; RCTs and Reviews; 26; 3; 3518 | Adults diagnosed with COPD<br><br>Usual care and SM intervention with single components | 4;<br>6-12 months   | SM interventions with either one component of symptoms management, management of mental health concerns, management of physical activities or all three together. All delivered either by a single practitioner or multidisciplinary teams, as individual/group(s) single/multiple sessions;                                                                                            | ED visits, HRQoL                                                                                                                            |

|    |                       |                                                            |                                                                                                                                                                               |                     |                                                                                                                                                                                                                                                                                                                                                                                                                                                                      |                                                                                                                                 |
|----|-----------------------|------------------------------------------------------------|-------------------------------------------------------------------------------------------------------------------------------------------------------------------------------|---------------------|----------------------------------------------------------------------------------------------------------------------------------------------------------------------------------------------------------------------------------------------------------------------------------------------------------------------------------------------------------------------------------------------------------------------------------------------------------------------|---------------------------------------------------------------------------------------------------------------------------------|
|    |                       |                                                            |                                                                                                                                                                               |                     | Primary, Secondary, Community                                                                                                                                                                                                                                                                                                                                                                                                                                        |                                                                                                                                 |
| 16 | Zimbudzi et al (2018) | SR and meta-analysis; RCTs; 8; 4; 835                      | Adults diagnosed with T1DM, T2DM and CKD.<br><br>Usual Care                                                                                                                   | 4; 3-24 months      | SM interventions with the following components: education, provider feedback, provider reminders, patient education, patient reminders, and patient financial incentives with elements that included standardised training, multidisciplinary team, peer contact, keeping logs, goal setting skills, problem-solving skills, and seeking support. All delivered by single providers or MDTs as group/individual-based sessions;<br><br>Primary, Secondary, Community | BP, GFR, HbA1c;<br><br>Self-care behaviour, hospital admissions, ED visits, HRQoI                                               |
| 17 | Ditewig et al (2010)  | Narrative; RCTs; 19; 4; 4162                               | Adults with CHF<br><br>Usual Care                                                                                                                                             | 4; 6-24 months      | SM intervention consisting mainly of education components accompanied by self-monitoring of physical conditions, patient diary cards or devices. Interventions were delivered by primary and/or secondary care HCPs via visits or face-to-face in care settings including hospitals;<br><br>Primary, Secondary, Community                                                                                                                                            | Mortality, all-cause hospitals readmissions, CHF-hospitalization rate, QoI                                                      |
| 18 | Gorina et al (2018)   | Narrative; RCTs; 20; 7; 15439                              | Adults with LTCs (T2DM, hypertension, and hypercholesterolemia)<br><br>Usual care and groups who only received education or physical activity as a part of an SM intervention | 4; 3 months-3 years | SM interventions with multiple components including diet, physical activity, adherence to medical treatment, self-care and complication prevention and other components. Delivered by nurses or MDTs, face-to-face or/and telephone and carried out as an individual or/and group sessions;<br><br>Primary, Community                                                                                                                                                | Nutrition habits, Physical activity, adherence to medication, BMI, HbA1c, BP<br><br>(Only T2DM related outcomes were extracted) |
| 19 | Cutler (2018)         | Narrative; RCTs, Longitudinal and Qualitative; 19; 3; 2708 | Adults with T2DM<br><br>Other SM interventions components                                                                                                                     | 3; N/A              | SM interventions delivered as group sessions with multiple components including lifestyle, physical activity, medication adherence and other components;<br><br>Primary, Secondary, Community                                                                                                                                                                                                                                                                        | Self-efficacy, blood glucose, HbA1c, medication adherence.                                                                      |
| 20 | Wang et al (2017)     | SR and meta-analysis; RCTs; 25; 11; 13297                  | Adults with COPD<br><br>Usual Care                                                                                                                                            | 5; 2-48 months      | Multiple component SM interventions (Group or individual sessions) which included topics such as smoking cessation, direction to use inhalers, advice on exercise and other                                                                                                                                                                                                                                                                                          | QoI, COPD-related hospital admission rate, ED visits (COPD-related), Smoking status, Pulmonary functions, Depression, COPD      |

|    |                           |                                          |                                                                               |                           |                                                                                                                                                                                                                                                                                                                                                                                                           |                                                                                                                                                       |
|----|---------------------------|------------------------------------------|-------------------------------------------------------------------------------|---------------------------|-----------------------------------------------------------------------------------------------------------------------------------------------------------------------------------------------------------------------------------------------------------------------------------------------------------------------------------------------------------------------------------------------------------|-------------------------------------------------------------------------------------------------------------------------------------------------------|
|    |                           |                                          |                                                                               |                           | components. Interventions were delivered by different HCP, including nurses and pharmacists or MDTs.<br><br>Primary, Secondary, Community                                                                                                                                                                                                                                                                 | knowledge, BMI, Mortality rate.                                                                                                                       |
| 21 | Hosseinzadeh et al (2019) | Narrative; RCTs; 20; 10; 8998            | Adults with COPD<br><br>Usual Care                                            | 3;<br>6 weeks-4 years     | SM interventions with the following educational components: smoking cessation counselling; breathing and coughing skills; mental health education; exacerbation symptoms recognition and management; improving physical activity levels; the correct use of inhalers; and medication compliance, delivered face-to-face or/and via the Telephone by one or more HCP;<br><br>Primary, Secondary, Community | Qol and hospitalisation rate, COPD knowledge, Self-efficacy, Physical activity, Smoking cessation, Medication adherence and use, depression, anxiety. |
| 22 | Jeong et al (2018)        | SR and meta-analysis; RCTs; 37; 3; 5860  | Adults with T2DM<br><br>Usual Care                                            | 4;<br>3 -32 months        | Pharmacist-led programs consisted of information on disease and medications, adherence education, survival skills regarding hypo- and hyperglycaemia incidence, and insulin injection skills delivered as face-to-face intervention, telephone counselling, or group appointments, meetings, or education sessions;<br><br>Primary, Secondary, Community                                                  | HbA1c                                                                                                                                                 |
| 23 | Long et al (2019)         | SR and meta-analysis; RCTs; 10; 4; 1959  | Adults with COPD<br><br>Usual care or control                                 | 4;<br>2 weeks - 24months  | SM interventions with at least goal setting, motivational interviewing techniques, and COPD-related health education as components. Delivered face-to-face or/and via the Telephone by one or more HCP (Nurse, pharmacist, health coach);<br><br>Primary, Secondary                                                                                                                                       | HRQoL, All-cause hospital admissions; COPD related hospital admissions<br><br>Physical activity, self-care behaviour, and mood                        |
| 24 | Massimi et al (2017)      | SR and meta-analysis; RCTs; 29; 4; 10162 | >18 years of age with a diagnosis of LTC or multi-morbidity<br><br>Usual care | 5;<br>2 weeks - 24 months | Nurse-led multicomponent SM interventions with variety of modes of delivery: face-to-face or face or/and telephone and/or nurse visits;<br><br>Primary, Community                                                                                                                                                                                                                                         | Qol, HbA1c, BP<br>Mortality                                                                                                                           |
| 25 | Tan et al (2019)          | SR and meta-analysis; RCTs; 18; 7; 2,307 | Adults with Diabetes or/and hypertension<br><br>No intervention or            | 4.5;<br>2-36 months       | SM educational interventions consisted of individual face-to-face counselling and included educational components on the disease, complications, medication, side effects, adherence, lifestyle changes, self-                                                                                                                                                                                            | Medication adherence                                                                                                                                  |

|                        |                         |                                                            |                                                                                                                             |                         |                                                                                                                                                                                                                                                                                                                |                                                                                                                                                                                                                                                                                       |
|------------------------|-------------------------|------------------------------------------------------------|-----------------------------------------------------------------------------------------------------------------------------|-------------------------|----------------------------------------------------------------------------------------------------------------------------------------------------------------------------------------------------------------------------------------------------------------------------------------------------------------|---------------------------------------------------------------------------------------------------------------------------------------------------------------------------------------------------------------------------------------------------------------------------------------|
|                        |                         |                                                            | other interventions                                                                                                         |                         | monitoring and self-management skills. Delivered by pharmacists or nurses;<br><br>Primary, Secondary, Community                                                                                                                                                                                                |                                                                                                                                                                                                                                                                                       |
| 26                     | Sakakibara et al (2017) | SR and meta-analysis;<br>RCTs;<br>14;<br>4;<br>2,303       | Adults with a history of stroke<br><br>Usual care, waitlist control, no intervention controls                               | 4;<br>2 weeks-24 months | SM interventions with the following components: feedback on performance, goal setting/action planning, resource utilisation, and problem-solving delivered as an individual or/and group sessions or via telephone or telehealth instruments;<br><br>Primary, Community                                        | Risk factors of stroke: Alcohol, smoking, cholesterol, diet and nutrition, physical activity, glucose, medication adherence, BP                                                                                                                                                       |
| 27                     | Taylor et al (2014)     | Narrative review of reviews;<br>RCTs;<br>102;<br>8;<br>N/A | Adults with LTCs<br><br>N/A                                                                                                 | 4.5<br>6 weeks-1 year   | A wide variety of SM interventions with different components including action plans and goal setting, modes of delivery: face to face (Our focus), remote, tele-healthcare, web-based, and personnel delivering or facilitating the support including laypeople and HCPs;<br><br>Primary, Secondary, Community | BGL, HbA1c, BP, cholesterol, Self-efficacy, HRQoL, QoL                                                                                                                                                                                                                                |
| 28                     | Majothi et al (2015)    | SR and meta-analysis;<br>RCTs;<br>10;<br>8;<br>1,466       | Patients with COPD, recently discharged from hospital after an acute exacerbation;<br><br>Usual Care or other interventions | 4;<br>3-52 weeks        | Multicomponent SM interventions delivered before or after discharge from the hospital.<br><b>Components included:</b> training on medication adherence, inhaler technique, smoking cessation, nutritional advice, promoted exercise, and management of dyspnea;<br><br>Primary, Secondary, Community           | Primary care consultations, hospital admissions/re-admissions, LoS (Hospital), ED visits, and mortality.<br><br>HRQoL, self-efficacy, adherence to inhaler treatment and inhaler technique, smoking behaviours, physical activity, knowledge to treat exacerbations, depression score |
| <i>Case Management</i> |                         |                                                            |                                                                                                                             |                         |                                                                                                                                                                                                                                                                                                                |                                                                                                                                                                                                                                                                                       |
| 29                     | Oeseburg et al (2009)   | Narrative;<br>RCTs;<br>9;<br>3;<br>15 746                  | Community dwelling patients with LTCs;<br><br>Care without a case management component                                      | 3.5;<br>10-36 months    | Home visits and/or telephone calls.<br><br>Delivered by a case manager (nurse, social worker or nurse practitioner) who was either a member of an MDT or acted independently;<br><br>Primary, Secondary, Community                                                                                             | Hospital LoS, ED visits, Nursing Home admission                                                                                                                                                                                                                                       |
| 30                     | Stokes et al (2015)     | SR and Meta-analysis;<br>RCTs/CCTs;<br>36;<br>6;<br>23711  | Adult patients with LTCs;<br><br>Care without a case management component                                                   | 4;<br>6-60 months       | Community-based MDTs responsible for delivering and coordinating services; MDT care plan following a caseworker assessment, case manager constantly available to deal with problems. Delivered by a care manager, nurse, pharmacist, GP collaborating with                                                     | Self-assessed health status, mortality, healthcare utilisation (GP visits, social worker visits, nursing visits, ED visits, hospital admissions, Ambulance calls), patient satisfaction                                                                                               |

|                             |                                    |                                               |                                                                                |                          |                                                                                                                                                                                                                                                                                                                                                                                                                                                                                                                                                                                                                                              |                                                                                                                      |
|-----------------------------|------------------------------------|-----------------------------------------------|--------------------------------------------------------------------------------|--------------------------|----------------------------------------------------------------------------------------------------------------------------------------------------------------------------------------------------------------------------------------------------------------------------------------------------------------------------------------------------------------------------------------------------------------------------------------------------------------------------------------------------------------------------------------------------------------------------------------------------------------------------------------------|----------------------------------------------------------------------------------------------------------------------|
|                             |                                    |                                               |                                                                                |                          | nurse;<br>Primary, community                                                                                                                                                                                                                                                                                                                                                                                                                                                                                                                                                                                                                 |                                                                                                                      |
| 31                          | <b>Joo et al (2019)</b>            | Narrative review of reviews; SRs; 7; 5; 46572 | Adult patients with LTCs; Usual Care                                           | 4; 1 months – 15.9 years | Nurse-led or/ MDTs-led + case managers community- and hospital-based interventions which included assessment and planning, education, transitional services, referrals to primary or other social or health services, and face-to-face or telephone contacts for regular follow-up;<br>Primary, Secondary, Community                                                                                                                                                                                                                                                                                                                         | Hospital Readmissions, LoS, Nursing home admissions, ED visits, GP visits                                            |
| 32                          | <b>Joo and Liu (2017)</b>          | Narrative; RCTs; 10; 5; 7125                  | Adult patients with LTCs; Usual Care                                           | 3.5; 6 months- 5 years   | Nurse-led or/ MDTs-led continuous coordinated and comprehensive care intervention for participants with chronic illnesses with the following CM services common across the studies included: transitional care services between hospitals and home or other facilities, regular home visits, regular telephone calls, individual assessment and planning at the time of hospital discharge, referral services to social support or health services, education or self-management support, psychosocial supports such as empowerment and motivational encouragement and ongoing assessment until end of intervention;<br>Secondary, Community | Hospital Readmissions, LoS, hospital visits; QoI, Self-efficacy                                                      |
| <i>Discharge Management</i> |                                    |                                               |                                                                                |                          |                                                                                                                                                                                                                                                                                                                                                                                                                                                                                                                                                                                                                                              |                                                                                                                      |
| 33                          | <b>Echevarria et al (2016)</b>     | SR and Meta-analysis; RCTs; 8; 6; 1414        | Adults with COPD that were recently discharged from hospital; Usual Care       | 4.5; N/A                 | Hospital at Home Early Supported Discharge interventions provided by nurses or/and MDTs, which included plans to manage the patients' conditions at home and after discharge. Interventions mainly included components of home visiting, symptom management, and contacting the patient via the phone;<br>Secondary, Community                                                                                                                                                                                                                                                                                                               | Mortality, readmissions                                                                                              |
| 34                          | <b>Langhorne and Baylan (2017)</b> | SR and Meta-analysis; RCTs; 17; 8; 2422       | Adults that have been admitted to hospital with a clinical diagnosis of stroke | 5; 3-12 months           | Two main types of Early supported discharge interventions: 1- ESD service comprised an MDT which co-ordinated discharge from hospital, post-discharge care and provided rehabilitation and patient care at home or in a community setting.                                                                                                                                                                                                                                                                                                                                                                                                   | LoS at hospital, hospital, Readmission, death, physical dependency; ADL, QoI, depression score, Patient satisfaction |



|    |                                   |                                                         |                                                                                                               |                     |                                                                                                                                                                                                                                                                                                                                                                                                                       |                                                                                                                                 |
|----|-----------------------------------|---------------------------------------------------------|---------------------------------------------------------------------------------------------------------------|---------------------|-----------------------------------------------------------------------------------------------------------------------------------------------------------------------------------------------------------------------------------------------------------------------------------------------------------------------------------------------------------------------------------------------------------------------|---------------------------------------------------------------------------------------------------------------------------------|
|    |                                   |                                                         | Usual Care                                                                                                    |                     | 2- ESD team co-ordination by which discharge home and the immediate post-discharge care were planned and supervised by a coordinated multidisciplinary team and after discharge care was subsequently handed over to existing community-based agencies who provided continuing rehabilitation and support at home;<br><br>Secondary, Community                                                                        |                                                                                                                                 |
| 35 | Gonçalves-Bradley et al (2017)    | SR and Meta-analysis; RCTs; 32; 6; 4746                 | Adults with different LTCs<br><br>Usual Care                                                                  | 4.5; 3-12 months    | Early discharge hospital at home interventions by which care was provided by a hospital outreach service. In addition, some interventions care was coordinated by a hospital-based stroke team or physician in conjunction with community-based services;<br><br>Primary, Secondary, Community                                                                                                                        | Mortality, Hospital readmission, Living in an institutional setting, LoS (hospital), Patient satisfaction.                      |
| 36 | Yang et al (2017)                 | SR and Meta-analysis; RCTs; 31; 3; 6715                 | Adults with COPD<br><br>Usual Care                                                                            | 4.5; 3-12 months    | Different post-discharge interventions which including home visiting (Mainly by nurses), action plans and telemonitoring, and home base rehabilitation in addition to education;<br><br>Primary, Community                                                                                                                                                                                                            | Readmission rates, mortality, QoI                                                                                               |
| 37 | Shepperd et al (2016)             | SR and Meta-analysis; RCTs; 16; 5; 1814                 | Adults with different LTCs<br><br>Inpatient care                                                              | 4; 3-12 months      | Admission avoidance hospital at home interventions which provide active treatment by healthcare professionals (care was provided by single HCPs or MDTs), in the patient's home;<br><br>Primary, Community                                                                                                                                                                                                            | Mortality, hospital readmissions;<br><br>Living in an institutional setting, Patient satisfaction, LoS at home and/or hospital. |
| 38 | Braet, Weltens and Sermeus (2016) | SR and Meta-analysis; RCTs; 51; 2; 10-3988 (Median 175) | Adults discharged from a medical or Surgical ward<br><br>Usual Care, attention controls, other interventions. | 5; 4 weeks-3 months | Post or/and pre-discharge interventions categorise based on a taxonomy stated by the review: education, discharge planning, medication intervention, appointment scheduled, rehabilitation, streamlining, home visit, patient empowerment, Transition coach, patient-centred documents, timely communication. Timely follow-up, Telephone call, patient hotline, Telemonitoring.<br><br>Primary, Secondary, Community | Readmissions;<br><br>ED visits, mortality, patient satisfaction.                                                                |
| 39 | Prvu et al., (2012)               | Narrative; RCTs; 62;                                    | Adults with Stroke and MI                                                                                     | 4.5; N/A            | Different types of Transitional care interventions which included hospital initiated (Start at the                                                                                                                                                                                                                                                                                                                    | Mortality, patient satisfaction, QoI, Physical activity, depression, anxiety,                                                   |



|                                |                      |                                                     |                                                                                 |                                                                                                                   |                                                                                                                                                                                                                                                                                                                                                                                                     |                                                                                         |
|--------------------------------|----------------------|-----------------------------------------------------|---------------------------------------------------------------------------------|-------------------------------------------------------------------------------------------------------------------|-----------------------------------------------------------------------------------------------------------------------------------------------------------------------------------------------------------------------------------------------------------------------------------------------------------------------------------------------------------------------------------------------------|-----------------------------------------------------------------------------------------|
|                                |                      | 4;<br>N/A                                           | Usual Care                                                                      | (We could not access the supplementary material provided by this review which included information on follow-ups) | hospital), Patient and family education, community-based, diseases management provided by single HCP or social worker or MDTs with different forms of contact including in-person home or clinic visits and telephone;<br><br>Primary, Secondary, Community                                                                                                                                         | LoS (hospital), hospital readmissions, Specialist visits, ED visits, outpatient visits. |
| 40                             | Roper et al (2017)   | Narrative;<br>Observational;<br>3;<br>3;<br>277100  | Adults with LTCs<br><br>No intervention                                         | 3;<br>11-23 months                                                                                                | Transitional care interventions with the following components: high-intensity service for high-risk patients, post-hospital palliative care consultations, home visits by care managers, telehealth management, pre-discharge patient-centred instructions;<br><br>Primary, Secondary, Community                                                                                                    | 30 days readmissions (by percentage and by risk groups), Risk of readmission,           |
| 41                             | Allen et al (2014)   | Narrative;<br>RCTs;<br>12;<br>8;<br>4522            | Adult with LTCs<br><br>Standard Hospital Discharge                              | 3.5;<br>1-6 months                                                                                                | Transitional care interventions with mainly discharge planning including health teaching medication and symptoms managements (Self-management), post-discharge follow-ups via phone or in-person;<br><br>Primary, Secondary, Community                                                                                                                                                              | Readmission, LoS (Hospital);<br><br>Depressive symptoms, Qol                            |
| 42                             | Leppin et al (2014)  | SR and Meta-analysis;<br>RCTs;<br>42;<br>6;<br>8401 | Older patients and patients with LTCs<br><br>Usual care and other interventions | 4;<br>2 weeks-1 months                                                                                            | DM interventions which included anywhere from the following: CM, patient education and self-management , home visits delivered by nurses or caregivers and other HCPs;<br><br>Secondary, Community                                                                                                                                                                                                  | 30 days readmission                                                                     |
| <i>Multidisciplinary Teams</i> |                      |                                                     |                                                                                 |                                                                                                                   |                                                                                                                                                                                                                                                                                                                                                                                                     |                                                                                         |
| 43                             | Hickman et al (2015) | Narrative;<br>RCTs;<br>7;<br>4;<br>1558             | Older Patients with complex needs<br><br>Usual Care                             | 3;<br>2-6 months                                                                                                  | Different complex MDTs interventions with different components including standard geriatric care criteria and oral and written recommendations, hospital initiated tailored exercise program plus 1 home visit post-discharge, & phone calls for maximum 24 weeks, discharge planning (With MDT component), tailored geriatric treatment, daily multidisciplinary geriatric care all with different | Hospital readmissions, LoS (Hospital), ED visits                                        |

|                              |                                      |                                                                             |                                                                                                                                                     |                     |                                                                                                                                                                                                                                                                                                                                                               |                                                                                                                                                                                                                                                                                  |
|------------------------------|--------------------------------------|-----------------------------------------------------------------------------|-----------------------------------------------------------------------------------------------------------------------------------------------------|---------------------|---------------------------------------------------------------------------------------------------------------------------------------------------------------------------------------------------------------------------------------------------------------------------------------------------------------------------------------------------------------|----------------------------------------------------------------------------------------------------------------------------------------------------------------------------------------------------------------------------------------------------------------------------------|
|                              |                                      |                                                                             |                                                                                                                                                     |                     | modes of delivery including telephone and provided by different MDTs;<br><br>Primary, Secondary, Community                                                                                                                                                                                                                                                    |                                                                                                                                                                                                                                                                                  |
| 44                           | <b>Siaw et al (2019)</b>             | SR and Meta-analysis;<br>RCTs;<br>16;<br>3;<br>2422                         | Adults with T1DM/T2DM<br><br>Usual Care                                                                                                             | 4;<br>3-12 months   | Medication review, medication optimisation, and educational counselling delivered by single or multiple care providers as a member of an MDT (Pharmacists, nurses, dietitians, community health workers, health coaches, and peer leaders);<br><br>Primary, Secondary, Community                                                                              | BP, HbA1c, LDL<br><br>QoL, emotional distress (depression and anxiety), Diabetes-related knowledge, self-efficacy, medication adherence, self-management (defined as care activities such as diet, exercise, self-monitoring of blood glucose, foot care, and smoking cessation) |
| 45                           | Shi et al (2018)                     | SR and Meta-analysis;<br>RCTs, Cohort;<br>21;<br>5;<br>10,284               | Adults with CKD<br><br>Composition of the MDT                                                                                                       | 3.5;<br>1-5.7 years | N/A                                                                                                                                                                                                                                                                                                                                                           | All-cause mortality, temporal catheterisation, risk of hospitalisation, eGFR                                                                                                                                                                                                     |
| 46                           | <b>Health Quality Ontario (2012)</b> | SR of reviews and Meta-analysis;<br>RCTs;<br>24;<br>6;<br>N/A               | Adult patients with HF, diabetes, or COPD<br><br>(only COPD and HF patients were targeted with the intervention of interest-MDT-)<br><br>Usual Care | 3.5;<br>N/A         | Interventions to provide formalised links between primary and specialist care via disease-specific education, medication review, physical activity and lifestyle counselling, self-care and follow-up. Delivered by intermediate care teams including GPs, specialists, nurses, social workers, pharmacists, dieticians.<br><br>Primary, Secondary, Community | All-cause mortality, Hospitalization, ED visits, HbA1c, BP, cholesterol, QoL                                                                                                                                                                                                     |
| 47                           | <b>Health Quality Ontario (2013)</b> | Narrative;<br>Observational, RCTs and SR;<br>20;<br>5;<br>N/A               | Adult patients with one or more chronic diseases<br><br>N/A                                                                                         | 3.5;<br>N/A         | Informational, management and relational continuity. Assessed by: Duration (length of relationship), Density (number of visits with the same provider in a set period), Dispersion (visits with distinct providers), Sequence (order of seeing providers).<br><br>Primary, Community                                                                          | All-Cause Mortality, Hospitalization, ED visits, HbA1c                                                                                                                                                                                                                           |
| <i>Complex Interventions</i> |                                      |                                                                             |                                                                                                                                                     |                     |                                                                                                                                                                                                                                                                                                                                                               |                                                                                                                                                                                                                                                                                  |
| 48                           | Baxter et al (2018)                  | Narrative;<br>RCTs;<br>267 (123 quantitative, 101 qualitative, 43 reviews); | All patients including patients with LTCs<br><br>N/A                                                                                                | 4.5;<br>1-5.7 years | Wide variety of CM and MDT interventions (In addition to ICP which was not focused on in our review);<br><br>Primary, Secondary, Community                                                                                                                                                                                                                    | GP appointments, Clinician contact, LoS, unplanned admissions, readmissions, ED visits, Patient satisfaction                                                                                                                                                                     |

|    |                                    |                                               |                                                                                       |                      |                                                                                                                                                                                                                                                                                                           |                                                                                                                                        |
|----|------------------------------------|-----------------------------------------------|---------------------------------------------------------------------------------------|----------------------|-----------------------------------------------------------------------------------------------------------------------------------------------------------------------------------------------------------------------------------------------------------------------------------------------------------|----------------------------------------------------------------------------------------------------------------------------------------|
|    |                                    | 11;<br>N/A                                    |                                                                                       |                      |                                                                                                                                                                                                                                                                                                           |                                                                                                                                        |
| 49 | Flanagan, Damery and Combes (2017) | Narrative; Review of Reviews; 41; 11; 159,134 | Adults with LTCs<br><br>Usual Care                                                    | 4;<br>1-60 months    | Assessed a wide variety of interventions, including SM, CM, MDT, CCM, and DM.<br><br>Primary, Secondary, Community                                                                                                                                                                                        | Ool                                                                                                                                    |
| 50 | <b>Valentijn et al (2018)</b>      | SR and Meta-analysis; RCTs; 14; 3; 4693       | Adults with CKD<br><br>Usual Care                                                     | 4;<br>3 – ≥12 months | SM, CM, MDTs interventions and SM and CM interventions combined with MDTs;<br><br>Primary, Secondary, Community                                                                                                                                                                                           | All-cause mortality, HRQol, all-cause hospitalisation, eGFRs, risk of dialysis, BP, creatinine                                         |
| 51 | Smith et al (2016)                 | SR and Meta-analysis; RCTs; 18; 9; 8727       | Adults with multimorbidity<br><br>Usual Care                                          | 5;<br>6 –12 months   | SM, MDTs, and CM interventions labelled as patient-oriented or organisational, delivered mainly by nurses through visits and face-to-face with or without telephone follow-ups;<br><br>Primary, Community                                                                                                 | Hb1Ac, BP, Cholesterol, Mortality, Depression scores, Anxiety scores, Qol, Self-efficacy, Hospital admission, Exercise/diet, self-care |
| 52 | <b>Kruis et al (2013)</b>          | SR and Meta-analysis; RCTs; 26; 4; 2997       | Adults with COPD<br><br>Usual care or other interventions                             | 5;<br>3 –24 months   | Integrated Disease management interventions with multiple components (Sub-interventions) including SM, CM, and MDTs;<br><br>Primary, Secondary, Community                                                                                                                                                 | HRQol, Respiratory-related hospital admissions, LoS (Hospital)                                                                         |
| 53 | Murphy et al (2017)                | SR and Meta-analysis; RCTs; 42; 4; 11250      | Adults with poor control of T2DM<br><br>Usual care or minor enhanced elements of care | 4.5;<br>3 –36 months | Organisational interventions (Included CM), and patient-centred interventions (Included SM);<br><br>The review included other single element and telehealth interventions which is not the focus of our review. Hence, we only focused on the CM and SM interventions included.<br><br>Primary, Community | HbA1c, BP, lipid control<br><br>BMI, Depression, Medication adherence                                                                  |
| 54 | <b>Kastner et al (2018)</b>        | SR and Meta-analysis; RCTs; 25; 5; 12 579     | Older patients with multimorbidity<br><br>Usual care                                  | 4.5;<br>3 –36 months | Care coordination interventions which included combinations of multiple interventions including CM, SM, ED (Separate Education intervention with no other SM components);<br><br>Primary, Secondary, Community                                                                                            | Depressive symptoms, HbA1c, mortality;<br><br>Cognitive functioning, Qol                                                               |
| 55 | <b>Takeda et al (2019)</b>         | SR and Meta-analysis; RCTs; 47; 4; 10,869     | Adults with a history of HF<br><br>Usual Care                                         | 5;<br>2 –12 months   | CM interventions consisting of intense monitoring of patients following discharge from hospital done by a nurse and typically involves home visits or telephone calls, or both. MDTs with a holistic approach to the individuals' medical, psychosocial, behavioural and                                  | All-cause mortality, HF-related readmissions, All-cause readmissions;<br><br>HRQol                                                     |

|                                                                                                                                                                                                                                                                                                                                                                                                                                                                                                                                                                                                                                                                                                                                                                                        |                                           |                                                                          |                                                               |                           |                                                                                                                                                                                                                                                                                                                   |                                                                                                                                                                             |
|----------------------------------------------------------------------------------------------------------------------------------------------------------------------------------------------------------------------------------------------------------------------------------------------------------------------------------------------------------------------------------------------------------------------------------------------------------------------------------------------------------------------------------------------------------------------------------------------------------------------------------------------------------------------------------------------------------------------------------------------------------------------------------------|-------------------------------------------|--------------------------------------------------------------------------|---------------------------------------------------------------|---------------------------|-------------------------------------------------------------------------------------------------------------------------------------------------------------------------------------------------------------------------------------------------------------------------------------------------------------------|-----------------------------------------------------------------------------------------------------------------------------------------------------------------------------|
|                                                                                                                                                                                                                                                                                                                                                                                                                                                                                                                                                                                                                                                                                                                                                                                        |                                           |                                                                          |                                                               |                           | financial circumstances and typically involve several different professions working in collaboration;<br><br>Secondary, Community                                                                                                                                                                                 |                                                                                                                                                                             |
| 56                                                                                                                                                                                                                                                                                                                                                                                                                                                                                                                                                                                                                                                                                                                                                                                     | <b>Peytreman-Bridevaux, et al (2015)</b>  | SR and Meta-analysis;<br>RCTs;<br>20;<br>5;<br>81,746                    | >16 years dragonised with asthma<br><br>Usual Care            | 5;<br>3–12 months         | Interventions that included three main components: Organisational targeting Patients (CM, and other elements such as structured follow-ups), Organisational targeting healthcare professional and systems (Teamwork, integration of care), Patient-centred education and SM;<br><br>Primary, Secondary, Community | Asthma-specific quality of life score, hospitalisation, ED visits, Asthma exacerbations, Self-efficacy, Asthma severity score                                               |
| 57                                                                                                                                                                                                                                                                                                                                                                                                                                                                                                                                                                                                                                                                                                                                                                                     | <b>Baker et al (2018)</b>                 | Narrative;<br>RCTs;<br>15;<br>1;<br>7813                                 | Adults with LTCs and/or multimorbidity<br><br>No intervention | 4.5;<br>1-36 months       | Comprehensive care management interventions with SM and elements of CM such as care plans and care coordination with additional elements such as care navigation.<br><br>N/A                                                                                                                                      | ED visits, readmissions, outpatient GP visits, HbA1c, BP, BMI, Depression score, Medication adherence                                                                       |
| 58                                                                                                                                                                                                                                                                                                                                                                                                                                                                                                                                                                                                                                                                                                                                                                                     | <b>Damery, Flanagan and Combes (2016)</b> | Narrative;<br>Review of Reviews;<br>50;<br>11;<br>219 475                | Adults with LTCs<br><br>Usual Care                            | 4.5;<br>2 weeks-60 months | Assessed a wide variety of interventions, including SM, CM, MDT, CCM, and DM.<br><br>Primary, Secondary, Community                                                                                                                                                                                                | Admissions, readmissions, LoS, ED visits                                                                                                                                    |
| 59                                                                                                                                                                                                                                                                                                                                                                                                                                                                                                                                                                                                                                                                                                                                                                                     | Mitchell et al (2015)                     | Narrative;<br>RCTs and Quasi-experimental;<br>14;<br>6;<br>5735 patients | Adults with LTCs<br><br>Usual Care                            | 4.5;<br>12-24 months      | The review looked at elements of different integrated primary-secondary care models which included combinations of MDTs and SM education elements with communication and information exchange, shared care guidelines or pathways as additional elements to support effectiveness.<br><br>Primary, Secondary      | Clinical outcomes for diabetes, heart failure, and COPD. Readmissions                                                                                                       |
| 60                                                                                                                                                                                                                                                                                                                                                                                                                                                                                                                                                                                                                                                                                                                                                                                     | Martínez-González et al (2014)            | SR of reviews and meta-analysis;<br>RCTs, SRs;<br>27;<br>4;<br>N/A       | Patient with LTC<br><br>N/A                                   | 3;<br>3-52 weeks          | Included any interventions based on disease management, case management, managed care, comprehensive care, multidisciplinary care, coordinated care, team care, CCMS.<br><br>Primary, Secondary, Community                                                                                                        | HbA1c, BP, Exercise capacity, QoL, Patient satisfaction, Medication adherence, admissions, readmissions, LoS, Ed visits, mortality, Time between discharge and readmission. |
| <p>QoL: Quality of Life, HRQoL: Health-Related Quality of Life, HbA1c: Hemoglobin A1c, BMI: Body Mass Index, ADL: Activities of Daily Living, COPD: Coronary Obstructive Pulmonary Disease, CKD: Chronic Kidney Disease, MI: Myocardial Infarction, HF: Heart Failure, T1DM/T2DM: Type 1 or 2 Diabetes Mellitus, eGFR: Estimated Glomerular Filtration Rate, BP: Blood Pressure, CRP: C-reactive protein, BGL: Blood Glucose Levels, ESRD: End Stage Renal Disease, LoS: Length of Stay, HDL/LDL: High/Low Density Lipoprotein, CHF: Chronic Heart Failure, ED: Emergency Department, GP: General Practitioner, SR: Systematic Review, CCM: Chronic Care Model, CCT: Controlled Clinical Trial, RCT: Randomised Control Trial, ESD: Early Supported Discharge, N/A: Not Applicable</p> |                                           |                                                                          |                                                               |                           |                                                                                                                                                                                                                                                                                                                   |                                                                                                                                                                             |

## Description of Interventions:

**Supplementary Table 2:** Intervention groupings with description (descriptions were adapted from the work of Damery, Flanagan and Combes (2016))

| <b>Category</b>                | <b>Description of intervention</b>                                                                                                                                                                                                                                                                                                         |
|--------------------------------|--------------------------------------------------------------------------------------------------------------------------------------------------------------------------------------------------------------------------------------------------------------------------------------------------------------------------------------------|
| <b>Self-management</b>         | Interventions designed to provide patient support, typically via tailored education to inform the patient about their condition(s), recognising signs and symptoms of disease exacerbation, dietary and lifestyle advice and/or condition-specific education supporting medication adherence                                               |
| <b>Case management</b>         | Based on implementation of a collaborative process between one or more care coordinators or case managers and the patient, to assess, plan and facilitate service delivery for patients with chronic diseases, particularly when transitions across healthcare settings are required                                                       |
| <b>Discharge management</b>    | Interventions designed to facilitate effective transitions from hospital care to other settings. Typically includes a pre-discharge phase of support, transitional care for the move between the hospital and community/home setting and post-discharge follow-up and monitoring, often incorporating rehabilitation or reablement support |
| <b>Multidisciplinary teams</b> | Interventions comprising teams composed of multiple health and/or social care professionals working together to provide care for people with complex needs. Teams typically included condition-specific expertise, nurses, occupational therapists, physiotherapists, social workers, GPs and occasionally pharmacists or case managers    |
| <b>Complex interventions</b>   | Interventions with multiple components (Any combination of the above or reviews which assessed a range of interventions rather than focusing on a single intervention or service model)                                                                                                                                                    |

## SCOPING REVIEW

### SEARCH TERMS (IN SCOPUS):

( TITLE-ABS-KEY ( "integrated care" ) AND TITLE-ABS-KEY ( chronic\* ) AND TITLE-ABS-KEY ( outcomes OR "quality of life" OR health\* OR effectiveness ) AND TITLE-ABS-KEY ( "systematic review" OR "meta-analysis " ) ) AND ( LIMIT-TO ( PUBSTAGE , "final" ) ) AND ( LIMIT-TO ( LANGUAGE , "English" ) ).

### RESULTS

**Supplementary Table 3:** Results of our Scoping Review

| Study                                      | Study Title                                                                                                                                                                       | Databases                                                                                                                                                                                                                                                                                                                                                                                                               | Key Search Terms                                                                                                                                                                                                                                                                                                                                                                                                                                |
|--------------------------------------------|-----------------------------------------------------------------------------------------------------------------------------------------------------------------------------------|-------------------------------------------------------------------------------------------------------------------------------------------------------------------------------------------------------------------------------------------------------------------------------------------------------------------------------------------------------------------------------------------------------------------------|-------------------------------------------------------------------------------------------------------------------------------------------------------------------------------------------------------------------------------------------------------------------------------------------------------------------------------------------------------------------------------------------------------------------------------------------------|
| <b>(Flanagan, Damery and Combes, 2017)</b> | The effectiveness of integrated care interventions in improving patient quality of life (QoL) for patients with chronic conditions. An overview of the systematic review evidence | MEDLINE, Embase, ASSIA (Applied Social Sciences Index and Abstracts), PsycINFO, Health Management Information Consortium database (HMIC), CINAHL, Cochrane library (including the Health Technology Assessment (HTA) database, Cochrane Database of Systematic Reviews, Database of Abstracts of Reviews of Effectiveness—DARE), EPPI-Centre library, TRIP database and the Health Economic Evaluations Database (HEED) | chronic OR “long term” OR Multimorb* OR morbidit*<br><br>MeSH terms for the 11 specific chronic diseases identified from scoping searches:<br>Hypertension<br>Diabetes Mellitus<br>Cardiovascular Diseases<br>Coronary Disease<br>Stroke<br>Ischemic Attack, Transient<br>Pulmonary Disease, Chronic<br>Obstructive<br>Neoplasms<br>Cancer<br>Depression<br>Dementia<br>Arthritis<br>Model OR integrat* OR “Case management”, “patient centred” |
| <b>(Damery, Flanagan and Combes, 2016)</b> | Does integrated care reduce hospital activity for patients with chronic diseases? An umbrella review of systematic reviews                                                        | Same as above (Flanagan, Damery and Combes, 2017)                                                                                                                                                                                                                                                                                                                                                                       | Same as above (Flanagan, Damery and Combes, 2017)                                                                                                                                                                                                                                                                                                                                                                                               |
| <b>(Martínez-González et al., 2014)</b>    | Integrated care programmes for adults with chronic conditions: A meta-review                                                                                                      | MEDLINE, CINAHL Embase, The Cochrane Database of Systematic Reviews                                                                                                                                                                                                                                                                                                                                                     | Chronic*, integra*, health planning*, care, healthcare or health care, “mental disorders”, HIV, depression, disorder*                                                                                                                                                                                                                                                                                                                           |
| <b>(Ouwens et al., 2005)</b>               | Integrated care programmes for chronically ill patients: a review of systematic reviews                                                                                           | Medline and Cochran                                                                                                                                                                                                                                                                                                                                                                                                     | ‘disease management’, ‘patient care management’, ‘patient-centred care’, ‘health planning’, ‘delivery of health care integrated’                                                                                                                                                                                                                                                                                                                |

## SEARCH STRATEGY

The most common search term used by the reviews of reviews in Table 2 were selected. We selected the terms based on the PICO framework below:

**Population:** Patients with Chronic diseases or long-term conditions

**Keywords:** Chronic, long term, Multimorbidity, complex needs

**Search terms:** Chronic OR “long term” OR Multimorb\* OR complex

**Intervention:** Integrated business case (Combined integrated care interventions)

**Keywords:** integrated care Program/intervention, complex intervention/program, multidisciplinary intervention/program.

**Comparator:** single integrated care interventions (Based on single models), or usual care

**Keywords:** Case management, Multidisciplinary teams, Self-management, discharge-management.

**Search Terms for comparator and intervention:** integrat\* OR multidisciplinary OR management OR discharge OR comprehensive OR continuity OR collaborative OR continuum OR shared OR transitional OR “community based”

AND Program OR Intervention\* OR Care OR healthcare OR “health care” OR planning

**Outcome:** Reduction in hospital admissions, increase in quality of care and health outcomes, increase in quality of life,

**Keywords:** hospitalisation, hospital care, hospital admissions, quality of life, quality of care, health outcomes.

**Search Terms:** hospital\* OR “quality of life” OR Qol OR outcomes OR effect\* OR admissions OR re?admissions OR Rehabilitation OR reduc\* OR prevention



**Comprehensive Search Terms:****CINAHL Plus and MEDLINE via EBSCO:**

- 1- Chronic OR “long term” OR Multimorb\* OR complex (ALL FIELDS)
- 2- **AND** integrat\* **OR** multidisciplinary **OR** management **OR** discharge **OR** comprehensive **OR** continuity **OR** collaborative **OR** continuum **OR** shared **OR** transitional **OR** “community based” **OR** Primary **OR** “Primary care homes” OR “patient activation” OR “Patient centred” OR personalised OR personalized (ALL FIELDS)
- 3- **AND** Program **OR** Intervention\* **OR** Care **OR** healthcare **OR** “health care” **OR** planning (ALL FIELDS)
- 4- **AND** hospital\* **OR** “quality of life” **OR** Qol **OR** outcomes **OR** effect\* **OR** admissions **OR** re?admissions **OR** Rehabilitation **OR** reduc\* **OR** prevention (ALL FIELDS)
- 5- **AND** "systematic review" **OR** "meta-analysis" **AND** Review (TITLE)
- 6- **NOT** protocol **OR** "cost effec\*" (TITLE)

**Cochrane Database of Systematic Reviews:**

- 1- Chronic OR “long term” OR Multimorb\* OR complex (Title Abstract Keyword)
- 2- **AND** integrat\* **OR** multidisciplinary **OR** management **OR** discharge **OR** comprehensive **OR** continuity **OR** collaborative **OR** continuum **OR** shared **OR** transitional **OR** “community based” **OR** Primary **OR** “Primary care homes” OR “patient activation” OR “Patient centred” OR personalised OR personalized (Title Abstract Keyword)
- 3- **AND** Program **OR** Intervention\* **OR** Care **OR** healthcare **OR** “health care” **OR** planning (Title Abstract Keyword)

4- AND hospital\* OR “quality of life” OR QoI OR outcomes OR effect\* OR admissions OR re?admissions OR Rehabilitation OR reduc\* OR prevention (Title Abstract Keyword)

**Boolean/Phrase (EBSCO):**

TX ( Chronic OR “long term” OR Multimorb\* OR complex ) AND TX ( integrat\* OR multidisciplinary OR management OR discharge OR comprehensive OR continuity OR collaborative OR continuum OR shared OR transitional OR “community based” OR Primary OR “Primary care homes” OR “patient activation” OR “Patient centred” OR personalised OR personalized ) AND TX ( Program OR Intervention\* OR Care OR healthcare OR “health care” OR planning ) AND TX ( hospital\* OR “quality of life” OR QoI OR outcomes OR effect\* OR admissions OR re?admissions OR Rehabilitation OR reduc\* OR prevention ) AND TI ( "systematic review" OR "meta-analysis" AND Review ) NOT TI ( protocol OR "cost effec\*")

**Boolean/Phrase (Cochrane):**

Chronic OR “long term” OR Multimorb\* OR complex in Title Abstract Keyword AND integrat\* OR multidisciplinary OR management OR discharge OR comprehensive OR continuity OR collaborative OR continuum OR shared OR transitional OR “community based” OR Primary OR “Primary care homes” OR “patient activation” OR “Patient centred” OR personalised OR personalized in Title Abstract Keyword AND Program OR Intervention\* OR Care OR healthcare OR “health care” OR planning in Title Abstract Keyword AND hospital\* OR “quality of life” OR QoI OR outcomes OR effect\* OR admissions OR re?admissions OR Rehabilitation OR reduc\* OR prevention

**Databases:** We selected the most common databases used by the reviews included in table 2. As a result, we decided to include: MEDLINE, CINAHL, and the Cochrane Database of Systematic Reviews.

## Quality Assessment Tool

**Supplementary Table 4:** Centre for Evidence-Based Medicine (CEBM) tool for critical appraisal of systematic reviews

| WHAT QUESTION (PICO) DID THE SYSTEMATIC REVIEW ADDRESS?                                                                                                                                                                                                                                                                                                                                                                                |                                                                                                                                                                                                                                                                                                                                                                                    |
|----------------------------------------------------------------------------------------------------------------------------------------------------------------------------------------------------------------------------------------------------------------------------------------------------------------------------------------------------------------------------------------------------------------------------------------|------------------------------------------------------------------------------------------------------------------------------------------------------------------------------------------------------------------------------------------------------------------------------------------------------------------------------------------------------------------------------------|
| What is best?                                                                                                                                                                                                                                                                                                                                                                                                                          | Where do I find the information?                                                                                                                                                                                                                                                                                                                                                   |
| The main question being addressed should be clearly stated. The exposure, such as a therapy or diagnostic test, and the outcome(s) of interest will often be expressed in terms of a simple relationship.                                                                                                                                                                                                                              | The <b>Title</b> , <b>Abstract</b> or <i>final paragraph of the Introduction</i> should clearly state the question. If you still cannot ascertain what the focused question is after reading these sections, search for another paper!                                                                                                                                             |
| This paper: Yes <input type="checkbox"/> No <input type="checkbox"/> Unclear <input type="checkbox"/>                                                                                                                                                                                                                                                                                                                                  |                                                                                                                                                                                                                                                                                                                                                                                    |
| Comment:                                                                                                                                                                                                                                                                                                                                                                                                                               |                                                                                                                                                                                                                                                                                                                                                                                    |
| F - Is it unlikely that important, relevant studies were missed?                                                                                                                                                                                                                                                                                                                                                                       |                                                                                                                                                                                                                                                                                                                                                                                    |
| What is best?                                                                                                                                                                                                                                                                                                                                                                                                                          | Where do I find the information?                                                                                                                                                                                                                                                                                                                                                   |
| The starting point for comprehensive search for all relevant studies is the major bibliographic databases (e.g., Medline, Cochrane, EMBASE, etc) but should also include a search of reference lists from relevant studies, and contact with experts, particularly to inquire about unpublished studies. The search should not be limited to English language only. The search strategy should include both MESH terms and text words. | The <b>Methods</b> section should describe the search strategy, including the terms used, in some detail. The <b>Results</b> section will outline the number of titles and abstracts reviewed, the number of full-text studies retrieved, and the number of studies excluded together with the reasons for exclusion. This information may be presented in a figure or flow chart. |
| This paper: Yes <input type="checkbox"/> No <input type="checkbox"/> Unclear <input type="checkbox"/>                                                                                                                                                                                                                                                                                                                                  |                                                                                                                                                                                                                                                                                                                                                                                    |
| Comment:                                                                                                                                                                                                                                                                                                                                                                                                                               |                                                                                                                                                                                                                                                                                                                                                                                    |
| A - WERE THE CRITERIA USED TO SELECT ARTICLES FOR INCLUSION APPROPRIATE?                                                                                                                                                                                                                                                                                                                                                               |                                                                                                                                                                                                                                                                                                                                                                                    |
| What is best?                                                                                                                                                                                                                                                                                                                                                                                                                          | Where do I find the information?                                                                                                                                                                                                                                                                                                                                                   |
| The inclusion or exclusion of studies in a systematic review should be clearly defined a priori. The eligibility criteria used should specify the patients, interventions or exposures and outcomes of interest. In many cases the type of study design will also be a key component of the eligibility criteria.                                                                                                                      | The <b>Methods</b> section should describe in detail the inclusion and exclusion criteria. Normally, this will include the study design.                                                                                                                                                                                                                                           |
| This paper: Yes <input type="checkbox"/> No <input type="checkbox"/> Unclear <input type="checkbox"/>                                                                                                                                                                                                                                                                                                                                  |                                                                                                                                                                                                                                                                                                                                                                                    |
| Comment:                                                                                                                                                                                                                                                                                                                                                                                                                               |                                                                                                                                                                                                                                                                                                                                                                                    |

| <i>A - WERE THE INCLUDED STUDIES SUFFICIENTLY VALID FOR THE TYPE OF QUESTION ASKED?</i>                                                                                                                                                                |                                                                                                                                                                                                                                                    |
|--------------------------------------------------------------------------------------------------------------------------------------------------------------------------------------------------------------------------------------------------------|----------------------------------------------------------------------------------------------------------------------------------------------------------------------------------------------------------------------------------------------------|
| What is best?                                                                                                                                                                                                                                          | Where do I find the information?                                                                                                                                                                                                                   |
| The article should describe how the quality of each study was assessed using predetermined quality criteria appropriate to the type of clinical question (e.g., randomization, blinding and completeness of follow-up)                                 | The <b>Methods</b> section should describe the assessment of quality and the criteria used. The <b>Results</b> section should provide information on the quality of the individual studies.                                                        |
| This paper: Yes <input type="checkbox"/> No <input type="checkbox"/> Unclear <input type="checkbox"/>                                                                                                                                                  |                                                                                                                                                                                                                                                    |
| Comment:                                                                                                                                                                                                                                               |                                                                                                                                                                                                                                                    |
| <i>T - WERE THE RESULTS SIMILAR FROM STUDY TO STUDY?</i>                                                                                                                                                                                               |                                                                                                                                                                                                                                                    |
| What is best?                                                                                                                                                                                                                                          | Where do I find the information?                                                                                                                                                                                                                   |
| Ideally, the results of the different studies should be similar or homogeneous. If heterogeneity exists the authors may estimate whether the differences are significant (chi-square test). Possible reasons for the heterogeneity should be explored. | The <b>Results</b> section should state whether the results are heterogeneous and discuss possible reasons. The forest plot should show the results of the chi-square test for heterogeneity and if discuss reasons for heterogeneity, if present. |
| This paper: Yes <input type="checkbox"/> No <input type="checkbox"/> Unclear <input type="checkbox"/>                                                                                                                                                  |                                                                                                                                                                                                                                                    |
| Comment:                                                                                                                                                                                                                                               |                                                                                                                                                                                                                                                    |
